# Supplementary material for: Genetic control of inflorescence architecture during rice domestication
Source: PubMed Central journal article supplement (PMC3731664; doi:10.1038/ncomms3200), 2013-07-25
Supplement: ncomms3200-s1.pdf [file ncomms3200-s1.pdf]

**Supplementary Information:**

**Genetic control of inflorescence architecture during rice domestication**

**Zuofeng Zhu<sup>1</sup>, Lubin Tan<sup>1</sup>, Yongcai Fu<sup>1</sup>, Fengxia Liu<sup>1</sup>, Hongwei Cai<sup>1</sup>, Daoxin Xie<sup>2</sup>, Feng Wu<sup>3</sup>, Jianzhong Wu<sup>4</sup>, Takashi Matsumoto<sup>4</sup>, Chuanqing Sun<sup>1\*</sup>**

<sup>1</sup>State Key Laboratory of Plant Physiology and Biochemistry, National Center for Evaluation of Agricultural Wild Plants (Rice), China Agricultural University, Beijing 100193, China.

<sup>2</sup>School of Life Sciences, Tsinghua University, Beijing 100084, China.

<sup>3</sup>Institute of Botany, Chinese Academy of Sciences, Beijing 100093, China.

<sup>4</sup>National Institute of Agrobiological Sciences, Tsukuba 305-8602, Japan.

\*Correspondence should be addressed to C.S. (suncq@cau.edu.cn)

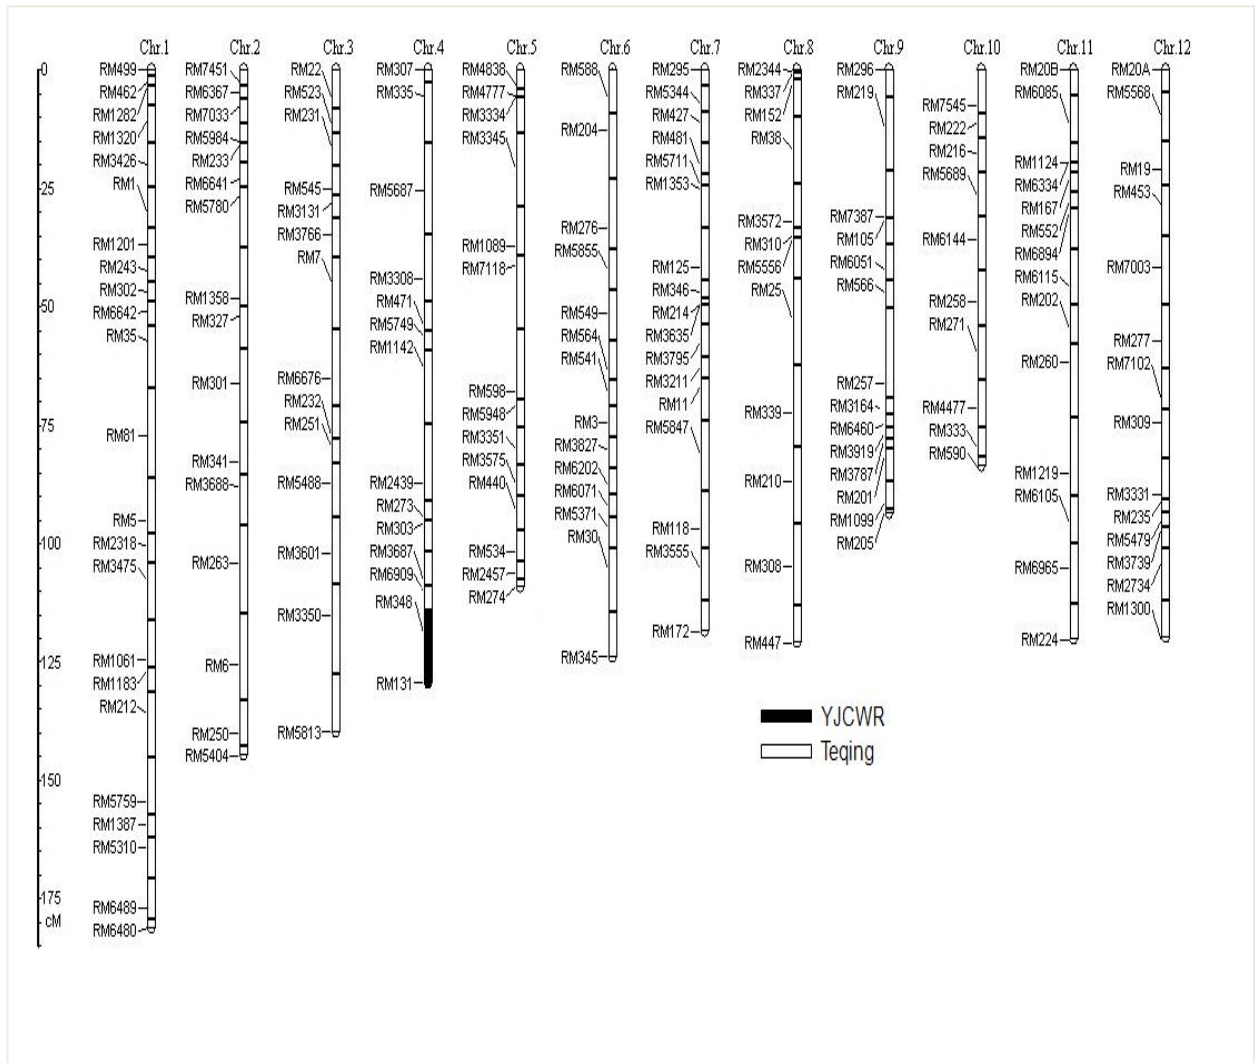

**Supplementary Figure S1.** Graphical genotypes of YIL31. The black regions indicate the homozygous regions for Yuanjiang common wild rice (*O. rufipogon*). The white regions indicate the homozygous regions for Teqing (*O. sativa ssp. indica*).

|        |     |                                                                      |     |
|--------|-----|----------------------------------------------------------------------|-----|
| YJCWR  | 1   | G TTCATT TAAATAATTATCACACATTATTCACCAGCCATTCAACATAAAAAGAACAGGGAA      | 60  |
| Teqing | 1   | G TTCATT TAAATAATTATCACACATTATTCACCAGCCATTCAACATAAAAAGAACAGGGAA      | 60  |
| YJCWR  | 61  | GAAGAAGCAACTATATGGATTGTGTCCCCTGATGATAATAGATACTATGTACTCTCTAG          | 120 |
| Teqing | 61  | GAAGAAGCAACTATATGGATTGTGTCCCCTGATGATAATAGATACTATGTACTCTCTAG          | 120 |
| YJCWR  | 121 | CCCGATATTTAATTATAAAGGGGGTGATCTATAGGTGCAAATGAAGATGGTGACCTGGTA         | 180 |
| Teqing | 121 | CCCGATATTTAATTATAAAGGGGGTGATCTATAGGTGCAAATGAAGATGGTGACCTGGTA         | 180 |
| YJCWR  | 181 | TGATCAATGTGGACAAGTGGGACATAATCATAAAAAGGAGTCCAGATACTGACCAATGCA         | 240 |
| Teqing | 181 | TGATCAATGTGGACAAGTGGGACATAATCATAAAAAGGAGTCCAGATACTGACCAATGCA         | 240 |
| YJCWR  | 241 | AATGCTGCGTCAGAGATTGTGATAGATGGAGGGCCAGATCGAGTCATGACCGGGCTGTGC         | 300 |
| Teqing | 241 | AATGCTGCGTCAGAGATTGTGATAGATGGAGGGCCAGATCGAGTCATGACCGGGCTGTGC         | 300 |
| YJCWR  | 301 | ATGCTACTAGCTATTACTCAAGGAGTACTGATCCAGTAGTACTACATGGGAAGGAATTAG         | 360 |
| Teqing | 301 | ATGCTACTAGCTATTACTCAAGGAGTACTGATCCAGTAGTACTACATGGGAAGGAATTAG         | 360 |
| YJCWR  | 361 | GAATAACAGGCAGCATAAGGCCTCAATGACATGAAAATCTTGTATGATGTATTAATTTGG         | 420 |
| Teqing | 361 | GAATAACAGGCAGCATAAGGCCTCAATGACATGAAAATCTTGTATGATGTATTAATTTGG         | 420 |
| YJCWR  | 421 | GTGTAAGATCACTGATCACAATGACCTGTAAAAGTAAACACCTATTTCTCTGAAAAGTTT         | 480 |
| Teqing | 421 | GTGTAAGATCACTGATCACAATGACCTGTAAAAGTAAACACCTATTTCTCTGAAAAGTTT         | 480 |
| YJCWR  | 481 | CTCGAAAACGTGTGGGGTTGCTGCATATAAATCCACCCTGTCTCGTCTGCTCTGCTCA           | 540 |
| Teqing | 481 | CTCGAAAACGTGTGGGGTTGCTGCATATAAATCCACCCTGTCTCGTCTGCTCTGCTCA           | 540 |
| YJCWR  | 541 | CTTTCAGGACGTGCCTTGGTGATCAAAAATTTCAACAATATATCTACATATTGCCCATAT         | 600 |
| Teqing | 541 | CTTTCAGGACGTGCCTTGGTGATCAAAAATTTCAACAATATATCTACATATTGCCCATAT         | 600 |
| YJCWR  | 601 | CACCATCTGCATGATTGAAACCTTGGTAAATTTAATTTACTTGTGTTTCAGTTGATCAG          | 660 |
| Teqing | 601 | CACCATCTGCATGATTGAAACCTTGGTAAATTTAATTTACTTGTGTTTCAGTTGATCAG          | 660 |
| YJCWR  | 661 | TTCACATGTGTCTGTACCAGTAAATGGAGTAAAAGAGTGACAGTACCCGGCCGATCGAT          | 720 |
| Teqing | 661 | TTCACATGTGTCTGTACCAGTAAATGGAGTAAAAGAGTGACAGTACCCGGCCGATCGAT          | 720 |
| YJCWR  | 721 | ATGATATGATCGAGCCGCTCGCGGTCCCCTA <b>InDel</b> GATCTATCTATCTATCTATCGCA | 780 |
| Teqing | 721 | ATGATATGATCGAGCCGCTCGCGGTCCCCTA <b>InDel</b> GATCTATCTATCTATCTATCGCA | 774 |
| YJCWR  | 781 | CAAAAGCTGCCGAAAATTGAAACAATTATTGGGATGATAGGACCAGCAATGTAAGCTGCA         | 840 |
| Teqing | 775 | CAAAAGCTGCCGAAAATTGAAACAATTATTGGGATGATAGGACCAGCAATGTAAGCTGCA         | 834 |
| YJCWR  | 841 | TCAGAGGCGAGATTGATCGGTTGATCAGAGGGCGATATGTTTGCGCCGATTGATTGCGAGA        | 900 |

Teqing 835 TCAGAGGCGAGATTGATCGGTTGATCAGAGGCGATATGTTTGCGCCGATTGATTTCGAGA 894  
 YJCWR 901 TTTTGTGGACTTCAAGGGGGTTTTCTGTGCTGTGCTGCCTTTTCGCTCATTCCAATCAG 959  
 Teqing 895 TTTTGTGGACTTCAAGGGGGTTTTCTGTGCTGTGCTGCCTTTTCGCTCATTCCAATCAG 954  
 YJCWR 960 AGCAGCTGCAACGCATGCATGCGCTTCTGAAACCTGCAAACGCCTGACCCTCAATGCTCA 1019  
 Teqing 955 AGCAGCTGCAACGCATGCATGCGCTTCTGAAACCTGCAAACGCCTGACCCTCAATGCTCA 1014  
 YJCWR 1020 ATGCAACTTTGAGTATATTATCGTGCACGTGGACGGCACAGCGATCCCAATCAGGTTTTG 1079  
 Teqing 1015 ATGCAACTTTGAGTATATTATCGTGCACGTGGACGGCACAGCGATCCCAATCAGGTTTTG 1074  
 YJCWR 1080 GTGGATAGAGTTTGTCTCATTTCGATCCAATTTATGGCTCTGTAATGCTGTTTTGCAGA 1139  
 Teqing 1075 GTGGATAGAGTTTGTCTCATTTCGATCCAATTTATGGCTCTGTAATGCTGTTTTGCAGA 1134  
 YJCWR 1140 GAAAAATTCAGTTCATTGTTTTCCCTGAATCACTAATTAATTAATCTCGTAGAGGTATA 1199  
 Teqing 1135 GAAAAATTCAGTTCATTGTTTTCCCTGAATCACTAATTAATTAATCTCGTAGAGGTATA 1194  
 YJCWR 1200 TTGAAAAAAAAACAAAGAAAAAAAAAGGTAGGAGATCGATCAAGAAGGATGGGCGGCGAAA 1259  
 Teqing 1195 TTGAAAAAAAAACAAAGAAAAAAAAAGGTAGGAGATCGATCAAGAAGGATGGGCGGCGAAA 1254  
 YJCWR 1260 GGTCAGATTTATTCGGATTTAATTCGTTTTGAAAATTGTGCAAGACCGGCTTGAAAAACA 1319  
 Teqing 1255 GGTCAGATTTATTCGGATTTAATTCGTTTTGAAAATTGTGCAAGACCGGCTTGAAAAACA 1314  
 YJCWR 1320 ACTCTCAGCTACAAGGAAAATCTTCACGTCTTTAACACTTATTGAAATCAATATGTTTT 1379  
 Teqing 1315 ACTCTCAGCTACAAGGAAAATCTTCACGTCTTTAACACTTATTGAAATCAATATGTTTT 1374  
 YJCWR 1380 GACAAGTTATGTAAGTGAGAAAATCGATTAATCAATGCGATGTTGTACATCATGTGGAAGA 1439  
 Teqing 1375 GACAAGTTATGTAAGTGAGAAAATCGATTAATCAATGCGATGTTGTACATCATGTGGAAGA 1434

**SNP1**

YJCWR 1440 AATTGCCCTTTGTTTTCTTGTGTTAATGGTGCACACTACTACTGGTAATGAATTCTT 1499  
 Teqing 1435 AATTGCCCTTTGTTTTCTTGTGTTAATGGTGCACACTACTACTGGTAATGAATTCTT 1494  
 YJCWR 1500 GGCTCTCTAGTTCATTAATTATAGGAAATTACTACATTGTCGTGGCAGGCTAAGGATTGT 1559  
 Teqing 1495 GGCTCTCTAGTTCATTAATTATAGGAAATTACTACATTGTCGTGGCAGGCTAAGGATTGT 1554  
 YJCWR 1560 TCTTTAACCTTTTTACCGTGGACGAAAAGAAACACAGAGAATTGAAGGAAAGGAAAAAAA 1619  
 Teqing 1555 TCTTTAACCTTTTTACCGTGGACGAAAAGAAACACAGAGAATTGAAGGAAAGGAAAAAAA 1614  
 YJCWR 1620 AAAAGGAGGCAACAACGCCACAAGCAGGAAGATCGAATGTACAGCAGGCTACCAAATAGT 1678  
 Teqing 1615 AAAAGGAGGCAACAACGCCACAAGCAGGAAGATCGAATGTACAGCAGGCTACCAAATAGT 1674

**SNP2**

**SNP3**

YJCWR 1679 CGATTAAGAAAAGGCACTATTTAATGTGACTATTCCTTATTTGCCTTGGTATTCATGCC 1738  
 Teqing 1675 TGATTAAGAAAAGGCACTATTTAATGTGACTATTCCTTATTTGCCTTGGTATTCATGCC 1734

YJCWR 1739 AAAAAATAGAAGAATTAACAAGTGATGGTTATTTAACTGACCGGTGGGCCCGGCGCTCTTG 1798  
 Teqing 1735 AAAAAATAGAAGAATTAACAAGTGATGGTTATTTAACTGACCGGTGGGCCCGGCGCTCTTG 1794

**SNP4**

YJCWR 1799 TCTGCCCTGGTCAGTTACTATTACCAGCTGCTTTTACCCTGGGCAACTCTGTTCAACCC 1858  
 Teqing 1795 TCTGCCCTGGTCAGTTACTATTACCAGCTGCTTTTACCCTGGGCAACTCTGTTCAACCC 1854

YJCWR 1859 AAAGTATTGCATCCGAGCCCAAGCCATGGACAAGCACACGTGGTCTTTCATGCCACTGCC 1918  
 Teqing 1855 AAAGTATTGCATCCGAGCCCAAGCCATGGACAAGCACACGTGGTCTTTCATGCCACTGCC 1914

YJCWR 1919 ACTTTGTACGGCAGTTTGGCGGTACATCGGATCGTCTGCGTCGCCTATGTTATGCTGCCA 1978  
 Teqing 1915 ACTTTGTACGGCAGTTTGGCGGTACATCGGATCGTCTGCGTCGCCTATGTTATGCTGCCA 1974

YJCWR 1979 TATTCATAGTAAGAGTAGTACTAGTGCGGAATTCGAATTAGACCGCGCATGGAGAAAAGA 2038  
 Teqing 1975 TATTCATAGTAAGAGTAGTACTAGTGCGGAATTCGAATTAGACCGCGCATGGAGAAAAGA 2034

YJCWR 2039 TCCAAAGCGTCTGTTGGGGGAGCTTCTAGTTGCTGTAGCTACTCCTAAAAATCAGAAGCT 2098  
 Teqing 2035 TCCAAAGCGTCTGTTGGGGGAGCTTCTAGTTGCTGTAGCTACTCCTAAAAATCAGAAGCT 2094

**SNP5**

YJCWR 2099 CCTTAAAACAGTCTAGCTTTTGGTCCAGATTTGAGAAGCTGTAATTGTAGAATCTAGAAA 2158  
 Teqing 2095 CCTTAAAACAGTCTAGCTTTTGGTCCAGATTTGAGAAGCTGTAATTGTAGAATCTAGAAA 2154

YJCWR 2159 ATGAACTAGCAGCCAGAAGCTGGGAAACCCAGCTTTTCCAGATTCTCAGAAGCTGGCTAC 2218  
 Teqing 2155 ATGAACTAGCAGCCAGAAGCTGGGAAACCCAGCTTTTCCAGATTCTCAGAAGCTGGCTAC 2214

YJCWR 2219 CAATCAACTGCTTCTTCGAATTTTAAGCTCCCTCAAACAGGCCCAAAGTCTTGTACATAG 2278  
 Teqing 2215 CAATCAACTGCTTCTTCGAATTTTAAGCTCCCTCAAACAGGCCCAAAGTCTTGTACATAG 2274

YJCWR 2279 ACAAGGAATATGAAATCTTTTGGTTGAAAACCTAAGTTAGGTATTAGCACGTGACATGAG 2338  
 Teqing 2275 ACAAGGAATATGAAATCTTTTGGTTGAAAACCTAAGTTAGGTATTAGCACGTGACATGAG 2334

**SNP6**

YJCWR 2339 CCTACACGTCTATATCAGTTTAGCGAAGCGTATAGTGTTAAGATTAATTCAAAATGACAA 2398  
 Teqing 2335 CCTACACGTCTATATCAGTTTAGCGAAGCGTATAGTGTTAAGATTAATTCAAAATGACAA 2394

**SNP7**

YJCWR 2399 CAACTCGTAAGGTTGAGAATGGGTTCTGACAATGGTCGGCTATGTACCTACAAAAGATCA 2458  
 Teqing 2395 CAACTCGTAAGGTTGAGAATGGGTTCTGACAATGGTCGGCTATGTACCTACAAAAGATCA 2454

**SNP8**

YJCWR 2459 CAAAACATATCTCGATCAATTCATTGTGATATTTAATGCCCCAAAGCAATATATAAGT 2518  
 Teqing 2455 CAAAACATATCTCGATCAATTCATTGTGATATTTAATGCCCCAAAGCAATATATAAGT 2514

**SNP9**

**SNP10**

YJCWR 2519 TTTCACATTTCCGCCGAATTCATCCAGAAACACATAATCGTGGAAAAGACTAAGCCTATCG 2578  
 Teqing 2515 TTTCACATTTCCGCCGAATTCATCCAGAAACACATAATCGTGGAAAAGACTAAGCCTATCG 2574

|        |      | <b>SNP11</b>                                                          |      |
|--------|------|-----------------------------------------------------------------------|------|
| YJCWR  | 2579 | GGTACCGCCGCCA <b>C</b> CGCGCCGGCCACGCGAGACCGGAAGCGCAGAAGATCCTGGCTATCC | 2638 |
| Teqing | 2575 | GGTACCGCCGCCA <b>C</b> CGCGCCGGCCACGCGAGACCGGAAGCGCAGAAGATCCTGGCTATCC | 2634 |
|        |      |                                                                       |      |
| YJCWR  | 2639 | ATGGACCACACAAGGCAGGGGCAGGCTCTTCCACAATCCCGGGTCTGGTGACATGAGCCA          | 2698 |
| Teqing | 2635 | ATGGACCACACAAGGCAGGGGCAGGCTCTTCCACAATCCCGGGTCTGGTGACATGAGCCA          | 2694 |
|        |      | <b>SNP12</b>                                                          |      |
| YJCWR  | 2699 | CAGTTGTGGCCCGAACAAAGTGACGTGTGTCGAGTCGAACGCCAGGCC <b>C</b> CGCGCACACAT | 2758 |
| Teqing | 2695 | CAGTTGTGGCCCGAACAAAGTGACGTGTGTCGAGTCGAACGCCAGGCC <b>C</b> CGCGCACACAT | 2754 |
|        |      |                                                                       |      |
| YJCWR  | 2759 | GCATTGCACTGGCACCCGCTGCGCCTGCGCTGCATGCACTGCTGCGTCCCAGCATTTTCT          | 2818 |
| Teqing | 2755 | GCATTGCACTGGCACCCGCTGCGCCTGCGCTGCATGCACTGCTGCGTCCCAGCATTTTCT          | 2814 |
|        |      |                                                                       |      |
| YJCWR  | 2819 | CCCCCTTCTTTTGTACCGGCTCCACACGCACCGCGCTCCTCCTGCTGGCCAAAAAGC             | 2878 |
| Teqing | 2815 | CCCCCTTCTTTTGTACCGGCTCCACACGCACCGCGCTCCTCCTGCTGGCCAAAAAGC             | 2874 |
|        |      |                                                                       |      |
| YJCWR  | 2879 | CAAATGTTGTGCTCCAAACGGCCGGCGTTCCGGCGGCTCGACCTCGACGCGACGTTGCT           | 2938 |
| Teqing | 2875 | CAAATGTTGTGCTCCAAACGGCCGGCGTTCCGGCGGCTCGACCTCGACGCGACGTTGCT           | 2934 |
|        |      |                                                                       |      |
| YJCWR  | 2939 | TTGCTTCGTGCTCGTGCATATACGGGTCGTTCTTTGCTTTTGCATATTTATATTGCAAAC          | 2998 |
| Teqing | 2935 | TTGCTTCGTGCTCGTGCATATACGGGTCGTTCTTTGCTTTTGCATATTTATATTGCAAAC          | 2994 |
|        |      |                                                                       |      |
| YJCWR  | 2999 | GGTGCGTGTGTGATGTGTCGATCGAATCCTGGTCAAATATGGCGTACTTTATTCTCGCAG          | 3058 |
| Teqing | 2995 | GGTGCGTGTGTGATGTGTCGATCGAATCCTGGTCAAATATGGCGTACTTTATTCTCGCAG          | 3054 |
|        |      |                                                                       |      |
| YJCWR  | 3059 | TTTGAGATCGATATGCTATTGCACCGAACGCTGCTCAGAGAGGGGGCTTTCTGACCAGCT          | 3118 |
| Teqing | 3055 | TTTGAGATCGATATGCTATTGCACCGAACGCTGCTCAGAGAGGGGGCTTTCTGACCAGCT          | 3114 |
|        |      |                                                                       |      |
| YJCWR  | 3119 | GGTAGGCAGGGGTGCAAAAAACCAGAGTCTAATTTTATATGTACTCTAATCTAAATTCAT          | 3178 |
| Teqing | 3115 | GGTAGGCAGGGGTGCAAAAAACCAGAGTCTAATTTTATATGTACTCTAATCTAAATTCAT          | 3174 |
|        |      |                                                                       |      |
| YJCWR  | 3179 | TAGCCTGATGATAGTATCCAGTAGCCACATAGCCAACAATTAGACAATTTCTTTTTTAA           | 3238 |
| Teqing | 3175 | TAGCCTGATGATAGTATCCAGTAGCCACATAGCCAACAATTAGACAATTTCTTTTTTAA           | 3234 |
|        |      |                                                                       |      |
| YJCWR  | 3239 | TGAAAAATCAGGTTATTTTGG                                                 | 3259 |
| Teqing | 3235 | TGAAAAATCAGGTTATTTTGG                                                 | 3255 |

**Supplementary Figure S2.** The variations in the 3.3 kb mapping region between Teqing and YIL31.

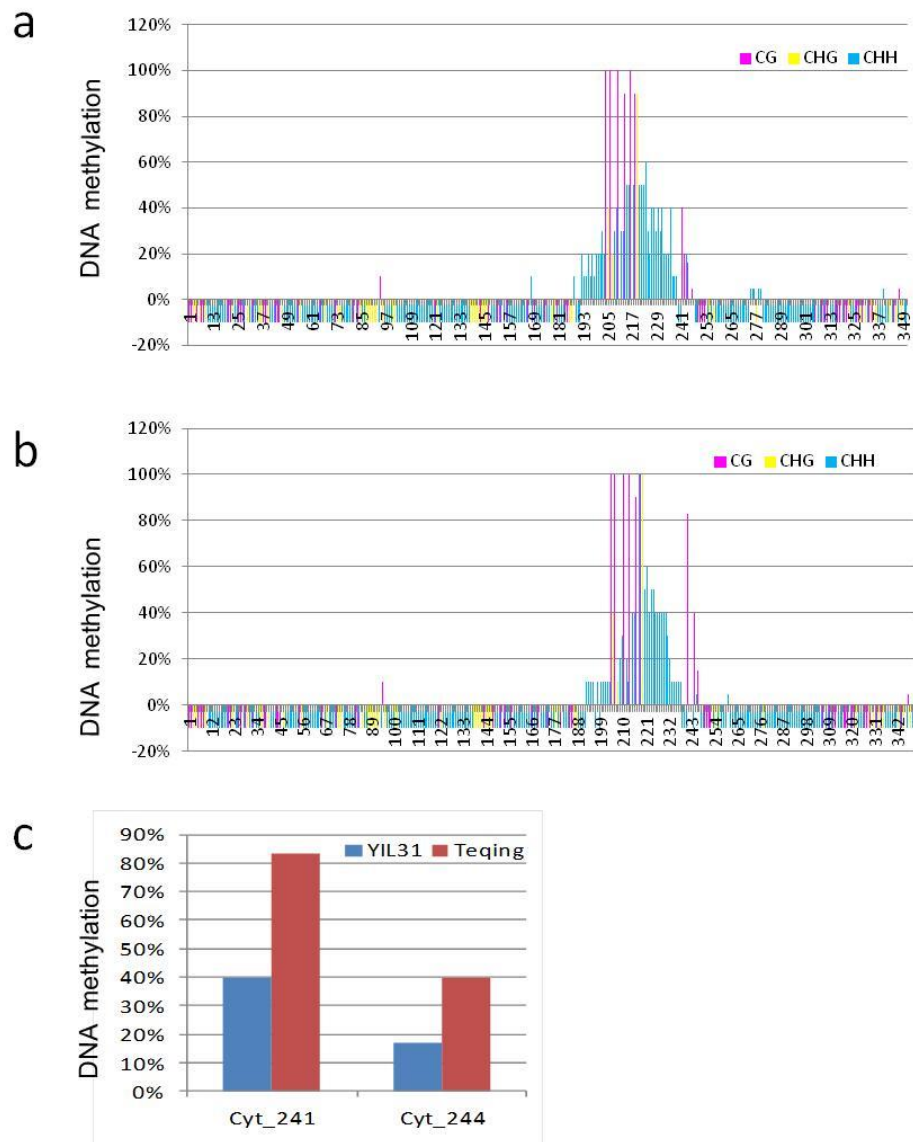

**Supplementary Figure S3. Comparison of the methylation level of the promoter region of *OsLG1* gene between YIL31 and Teqing.**

(a) and (b) The methylation level of the 1.4-kb promoter region of *OsLG1* gene in the branch pulvinus of panicle in YIL31 (a) and Teqing (b). The numbers under the graph indicate the position of the cytosine, which sequence position were listed in the **supplementary table 3**. (c) Comparison of methylation level at Cyt\_241 and Cyt\_244 cytosine site between YIL31 and Teqing.

**Supplementary Table S1.** Materials used in this study

| Name            | Origin           | Species name        | Phenotype | Haplotype |
|-----------------|------------------|---------------------|-----------|-----------|
| YJCWR*          | Yunnan,China     | <i>O. rufipogon</i> | spread    | H1        |
| W106*           | India            | <i>O. rufipogon</i> | spread    | H2        |
| IRGC105493      | Myanmar          | <i>O. rufipogon</i> | spread    | H2        |
| IRGC104308*     | Myanmar          | <i>O. rufipogon</i> | spread    | H3        |
| IRGC100926      | Myanmar          | <i>O. rufipogon</i> | spread    | H3        |
| W1294*          | Philippines      | <i>O. rufipogon</i> | spread    | H4        |
| IRGC100904*     | Thailand         | <i>O. rufipogon</i> | spread    | H5        |
| YD4-50*         | Jiangxi, China   | <i>O. rufipogon</i> | spread    | H6        |
| YD4-151*        | Jiangxi, China   | <i>O. rufipogon</i> | spread    | H7        |
| WRCAU1*         | Guangdong, China | <i>O. rufipogon</i> | spread    | H8        |
| YD2-0261*       | Guangxi, China   | <i>O. rufipogon</i> | spread    | H9        |
| YD2-0344        | Guangxi, China   | <i>O. rufipogon</i> | spread    | H9        |
| IRGC100204*     | India            | <i>O. rufipogon</i> | spread    | H10       |
| IRGC104311*     | Thailand         | <i>O. rufipogon</i> | spread    | H11       |
| IRGC104599      | Sri Lanka        | <i>O. rufipogon</i> | spread    | H11       |
| S9022*          | Guangdong, China | <i>O. rufipogon</i> | spread    | H12       |
| S8021*          | Guangdong, China | <i>O. rufipogon</i> | spread    | H13       |
| IRGC104389*     | Thailand         | <i>O. rufipogon</i> | spread    | H14       |
| W1943*          | Jiangxi, China   | <i>O. rufipogon</i> | spread    | H15       |
| WRCAU2*         | Hunan, China     | <i>O. rufipogon</i> | spread    | H16       |
| W1944*          | Hunan, China     | <i>O. rufipogon</i> | spread    | H17       |
| Teqing          | China            | <i>indica</i>       | compact   | H18       |
| Sanbaili        | China            | <i>indica</i>       | compact   | H18       |
| Esiniu          | China            | <i>indica</i>       | compact   | H18       |
| Huangsiguizhan  | China            | <i>indica</i>       | compact   | H18       |
| Shuusoushu*     | China            | <i>indica</i>       | compact   | H18       |
| Keiboba*        | China            | <i>indica</i>       | compact   | H18       |
| Deejiaohualuo*  | China            | <i>indica</i>       | compact   | H18       |
| Hong cheuhzai*  | China            | <i>indica</i>       | compact   | H18       |
| C418            | China            | <i>indica</i>       | compact   | H19       |
| Baimaodao       | China            | <i>indica</i>       | compact   | H19       |
| Xiangaizao 10   | China            | <i>indica</i>       | compact   | H19       |
| Nantehao        | China            | <i>indica</i>       | compact   | H19       |
| Shuiyuan300     | China            | <i>indica</i>       | compact   | H19       |
| Zhonglouyihao 1 | China            | <i>indica</i>       | compact   | H19       |
| Jiefangxian     | China            | <i>indica</i>       | compact   | H19       |
| Chaoyang 1 hao  | China            | <i>indica</i>       | compact   | H19       |
| L301B           | China            | <i>indica</i>       | compact   | H19       |
| Baoxie 123B     | China            | <i>indica</i>       | compact   | H19       |
| 80B             | China            | <i>indica</i>       | compact   | H19       |



**Supplementary Table S1** (continued)

| Name              | Origin | Species name  | Phenotype | Haplotype |
|-------------------|--------|---------------|-----------|-----------|
| Baoxie-7B         | China  | <i>indica</i> | compact   | H19       |
| Guangluai 4 hao   | China  | <i>indica</i> | compact   | H19       |
| Aijiaonante       | China  | <i>indica</i> | compact   | H19       |
| Baigedao          | China  | <i>indica</i> | compact   | H19       |
| IR661-1           | China  | <i>indica</i> | compact   | H19       |
| Liusha 1 hao      | China  | <i>indica</i> | compact   | H19       |
| Erjiunan 1 hao    | China  | <i>indica</i> | compact   | H19       |
| Chengduai 3 hao   | China  | <i>indica</i> | compact   | H19       |
| Zaoshouxiangheimi | China  | <i>indica</i> | compact   | H19       |
| Gongju 73         | China  | <i>indica</i> | compact   | H19       |
| Chikenuo          | China  | <i>indica</i> | compact   | H19       |
| Dongtignwanxian   | China  | <i>indica</i> | compact   | H19       |
| Bawangbian 1      | China  | <i>indica</i> | compact   | H19       |
| Xiangdao          | China  | <i>indica</i> | compact   | H19       |
| Xibainian         | China  | <i>indica</i> | compact   | H19       |
| Fanhaopi          | China  | <i>indica</i> | compact   | H19       |
| Xiangai B         | China  | <i>indica</i> | compact   | H19       |
| Zhenxian 97B      | China  | <i>indica</i> | compact   | H19       |
| 88 B              | China  | <i>indica</i> | compact   | H19       |
| Gu 154            | China  | <i>indica</i> | compact   | H19       |
| Gui 630           | China  | <i>indica</i> | compact   | H19       |
| Teqingxuanhui     | China  | <i>indica</i> | compact   | H19       |
| Xianghui 91269    | China  | <i>indica</i> | compact   | H19       |
| Baoxuan 21        | China  | <i>indica</i> | compact   | H19       |
| Xiangwanxian 1    | China  | <i>indica</i> | compact   | H19       |
| Luke 3            | China  | <i>indica</i> | compact   | H19       |
| Aituogu 3         | China  | <i>indica</i> | compact   | H19       |
| Xiangwanxian 3    | China  | <i>indica</i> | compact   | H19       |
| Chengnongshuijing | China  | <i>indica</i> | compact   | H19       |
| Jinxibai          | China  | <i>indica</i> | compact   | H19       |
| Xiaohonggu        | China  | <i>indica</i> | compact   | H19       |
| Laozaogu          | China  | <i>indica</i> | compact   | H19       |
| Qitougu           | China  | <i>indica</i> | compact   | H19       |
| Jinzhinuo         | China  | <i>indica</i> | compact   | H19       |
| Wuzuihonggu       | China  | <i>indica</i> | compact   | H19       |
| Zegu              | China  | <i>indica</i> | compact   | H19       |
| Minjiading 2      | China  | <i>indica</i> | compact   | H19       |
| Qingsiai 16B      | China  | <i>indica</i> | compact   | H19       |
| PeiC 112          | China  | <i>indica</i> | compact   | H19       |
| Yangdao 2         | China  | <i>indica</i> | compact   | H19       |

**Supplementary Table S1 (continued)**

| Name             | Origin     | Species name    | Phenotype | Haplotype |
|------------------|------------|-----------------|-----------|-----------|
| Momi             | China      | <i>indica</i>   | compact   | H19       |
| Aimi             | China      | <i>indica</i>   | compact   | H19       |
| Biwusheng        | China      | <i>indica</i>   | compact   | H19       |
| Jinyou 1         | China      | <i>indica</i>   | compact   | H19       |
| Mowanggu         | China      | <i>indica</i>   | compact   | H19       |
| Haoxiang         | China      | <i>indica</i>   | compact   | H19       |
| Feienuo 2        | China      | <i>indica</i>   | compact   | H19       |
| Xiangzaoxian 7   | China      | <i>indica</i>   | compact   | H19       |
| Shufeng 101      | China      | <i>indica</i>   | compact   | H19       |
| Xingguo          | China      | <i>japonica</i> | compact   | H19       |
| Longhuamaohulu   | China      | <i>japonica</i> | compact   | H19       |
| Weiguo           | China      | <i>japonica</i> | compact   | H19       |
| Tieganwu         | China      | <i>japonica</i> | compact   | H19       |
| Qitoubaigu       | China      | <i>japonica</i> | compact   | H19       |
| Annongwanjing B  | China      | <i>japonica</i> | compact   | H19       |
| Ninghui 21       | China      | <i>japonica</i> | compact   | H19       |
| Jan-76           | China      | <i>japonica</i> | compact   | H19       |
| Guihuahuang      | China      | <i>japonica</i> | compact   | H19       |
| Zhonghua 8 hao   | China      | <i>japonica</i> | compact   | H19       |
| Jindao 1hao      | China      | <i>japonica</i> | compact   | H19       |
| Jing 7623        | China      | <i>japonica</i> | compact   | H19       |
| Liaojing 287     | China      | <i>japonica</i> | compact   | H19       |
| Nantiangangjiugu | China      | <i>japonica</i> | compact   | H19       |
| Dahongmang       | China      | <i>japonica</i> | compact   | H19       |
| Muxiqiu          | China      | <i>japonica</i> | compact   | H19       |
| Hongqi 5         | China      | <i>japonica</i> | compact   | H19       |
| Sanbangqishiluo  | China      | <i>japonica</i> | compact   | H19       |
| Mubanggu         | China      | <i>japonica</i> | compact   | H19       |
| Lengshuigu 2     | China      | <i>japonica</i> | compact   | H19       |
| Laohuzhong       | China      | <i>japonica</i> | compact   | H19       |
| Wuzuizi          | China      | <i>japonica</i> | compact   | H19       |
| Ximaxian         | China      | <i>japonica</i> | compact   | H19       |
| Magunuo          | China      | <i>japonica</i> | compact   | H19       |
| Hongkezhegu      | China      | <i>japonica</i> | compact   | H19       |
| Younian          | China      | <i>japonica</i> | compact   | H19       |
| Taichong 65      | China      | <i>japonica</i> | compact   | H19       |
| JWR 221          | China      | <i>japonica</i> | compact   | H19       |
| Lixinjing        | China      | <i>japonica</i> | compact   | H19       |
| Shanjiugu        | China      | <i>japonica</i> | compact   | H19       |
| Shoni*           | Bangladesh | <i>indica</i>   | compact   | H19       |

**Supplementary Table S1 (continued)**

| Name                | Origin      | Species name  | Phenotype | Haplotype |
|---------------------|-------------|---------------|-----------|-----------|
| Tupa 121-3*         | Bangladesh  | <i>indica</i> | compact   | H19       |
| Jarjan*             | Bhutan      | <i>indica</i> | compact   | H19       |
| Bei Khe*            | Cambodia    | <i>indica</i> | compact   | H19       |
| Neang Menh*         | Cambodia    | <i>indica</i> | compact   | H19       |
| Neang Phtong*       | Cambodia    | <i>indica</i> | compact   | H19       |
| Ryou Suisan Koumai* | China       | <i>indica</i> | compact   | H19       |
| Jinguoyin*          | China       | <i>indica</i> | compact   | H19       |
| Qingyu(Seiyu) *     | China       | <i>indica</i> | compact   | H19       |
| Deng Pao Zhai*      | China       | <i>indica</i> | compact   | H19       |
| Kasalath*           | India       | <i>indica</i> | compact   | H19       |
| Naba*               | India       | <i>indica</i> | compact   | H19       |
| Puluik Arang*       | India       | <i>indica</i> | compact   | H19       |
| Muha*               | India       | <i>indica</i> | compact   | H19       |
| Jhona 2*            | India       | <i>indica</i> | compact   | H19       |
| Surjamukhi*         | India       | <i>indica</i> | compact   | H19       |
| ARC 7291*           | India       | <i>indica</i> | compact   | H19       |
| ARC 5955*           | India       | <i>indica</i> | compact   | H19       |
| Ratul*              | India       | <i>indica</i> | compact   | H19       |
| ARC 7047*           | India       | <i>indica</i> | compact   | H19       |
| ARC 11094*          | India       | <i>indica</i> | compact   | H19       |
| Nepal 555*          | India       | <i>indica</i> | compact   | H19       |
| Local Basmati*      | India       | <i>indica</i> | compact   | H19       |
| Padi Kuning*        | India       | <i>indica</i> | compact   | H19       |
| Rambhog*            | India       | <i>indica</i> | compact   | H19       |
| Pokkali*            | India       | <i>indica</i> | compact   | H19       |
| Milyang 23*         | Korea       | <i>indica</i> | compact   | H19       |
| Hakphaynhay*        | Laos        | <i>indica</i> | compact   | H19       |
| Vary Futsi*         | Madagascar  | <i>indica</i> | compact   | H19       |
| Shwe Nang Gyi*      | Myanmar     | <i>indica</i> | compact   | H19       |
| Radin Goi Sesat*    | Myanmar     | <i>indica</i> | compact   | H19       |
| Kemasin*            | Myanmar     | <i>indica</i> | compact   | H19       |
| Bingala*            | Myanmar     | <i>indica</i> | compact   | H19       |
| Chin Galay*         | Myanmar     | <i>indica</i> | compact   | H19       |
| Jene 035*           | Nepal       | <i>indica</i> | compact   | H19       |
| Napal 8*            | Nepal       | <i>indica</i> | compact   | H19       |
| Kalo Dhan*          | Nepal       | <i>indica</i> | compact   | H19       |
| Anjana Dhan*        | Nepal       | <i>indica</i> | compact   | H19       |
| Badari Dhan*        | Nepal       | <i>indica</i> | compact   | H19       |
| Davao 1*            | Philippines | <i>indica</i> | compact   | H19       |
| IR 58*              | Philippines | <i>indica</i> | compact   | H19       |

**Supplementary Table S1 (continued)**

| Name            | Origin        | Species name    | Phenotype | Haplotype |
|-----------------|---------------|-----------------|-----------|-----------|
| Tadukan*        | Philippines   | <i>indica</i>   | compact   | H19       |
| Calotoc*        | Philippines   | <i>indica</i>   | compact   | H19       |
| Lebed*          | Philippines   | <i>indica</i>   | compact   | H19       |
| Pinulupot 1*    | Philippines   | <i>indica</i>   | compact   | H19       |
| Basilanon*      | Philippines   | <i>indica</i>   | compact   | H19       |
| Vandaran*       | Sri Lanka     | <i>indica</i>   | compact   | H19       |
| Bleiyo*         | Thailand      | <i>indica</i>   | compact   | H19       |
| Tupa 729*       | Bangladesh    | <i>japonica</i> | compact   | H19       |
| Tima*           | Bhutan        | <i>japonica</i> | compact   | H19       |
| Jaguary*        | Brazil        | <i>japonica</i> | compact   | H19       |
| Padi Perak*     | India         | <i>japonica</i> | compact   | H19       |
| Phulba*         | India         | <i>japonica</i> | compact   | H19       |
| Nipponbare*     | Japan         | <i>japonica</i> | compact   | H19       |
| Khao Nok*       | Laos          | <i>japonica</i> | compact   | H19       |
| Khao Nam Jen*   | Laos          | <i>japonica</i> | compact   | H19       |
| Rexmont*        | United States | <i>japonica</i> | compact   | H19       |
| Khau Mac Kho*   | Vietnam       | <i>japonica</i> | compact   | H19       |
| Khau Tan Chiem* | Vietnam       | <i>japonica</i> | compact   | H19       |
| Urasan 1*       | Japan         | <i>japonica</i> | compact   | H19       |

\* , samples used to compare the nucleotide diversity.

**Supplementary Table S2** Primers used in this study

| Name                                              | Type  | Forward primer (5'-3')               | Reverse primer (5'-3')                 |
|---------------------------------------------------|-------|--------------------------------------|----------------------------------------|
| RM348                                             | SSR   | ccgctactaatagcagagag                 | ggagctttgttcttcgcaac                   |
| RM131                                             | SSR   | tcctccctcccttcgcccactg               | cgatgttcgcatggctgctcc                  |
| M1                                                | InDel | catccaaccgacacgcattttg               | gatttgagcagcggatgacg                   |
| M2                                                | SSR   | cttcagcttgacagggcagtg                | gaaaagagatgtctggacg                    |
| M3                                                | InDel | cgctcgtagagctgagagctagg              | ggatcagcagctactcactcc                  |
| M4                                                | SSR   | ctgtctacaacttaacgactagc              | gtggactcgtaaaactacgc                   |
| M5                                                | SNP   | gtcaaaaaagattaagcaag                 | ttttatgattatgtcccacttg                 |
| M6                                                | SNP   | gcacgtgacatgacctaacacg               | gcaaccttaggtcatcggttc                  |
| M7                                                | InDel | ggaattcctacgaaaccgtggac              | cagtttgacagatttaggggtc                 |
| SP1 for nucleotide diversity                      |       | ataagatggactaattggat                 | agattttcatgtcattgagg                   |
| SP2 for nucleotide diversity                      |       | cataaaaaggagtccagata                 | ttgaagtccaaaaatctcg                    |
| SP3 for nucleotide diversity                      |       | agtgaaatggagtaaaagag                 | agcctgccacgacaatgtag                   |
| SP4 for nucleotide diversity                      |       | ggtgcactacattactactgg                | ctcaaccttacgagtcgttgc                  |
| SP5 for nucleotide diversity                      |       | gcacgtgacatgacctaacacg               | gcaaccttaggtcatcggttc                  |
| SP6 for nucleotide diversity                      |       | gggcaggctcttcacaatc                  | ttattgcagtgtcgtctttt                   |
| 18S                                               |       | gctttggtgactctagataac                | gtcgggagtggttaatttc                    |
| <i>OsLG1</i> -oe for over expression <sup>a</sup> |       | <u>ggtaccatgatgaacgttccatc</u>       | <u>actagtgatcgaagtcgagatc</u>          |
| <i>OsLG1</i> for In situ hybridization            |       | gagacggtttcgagacacagc                | cgaagtcgagatcaaacatcg                  |
| <i>OsLG1</i> for quantitative RT-PCR              |       | agcttagccttccatcagca                 | agatcaaacatcgctgtcc                    |
| <i>OsLG1</i> for GFP analysis <sup>b</sup>        |       | at <u>ggtaccatgatgaacgttccatccgc</u> | at <u>gtcgacgtgatcgaagtcgagatcaaac</u> |

<sup>a</sup> The underline sites are *Kpn I* and *Spe I*, respectively.

<sup>b</sup> The underline sites are *Kpn I* and *Sal I*, respectively.

**Supplementary Table S3 The cytosine sites in the promoter of *OslG1* gene**

| Cyt_P | Seq_P | Cyt_P | Seq_P | Cyt_P | Seq_P | Cyt_P | Seq_P | Cyt_P      | Seq_P        | Cyt_P | Seq_P | Cyt_P | Seq_P |
|-------|-------|-------|-------|-------|-------|-------|-------|------------|--------------|-------|-------|-------|-------|
| 1     | -5    | 51    | -241  | 101   | -383  | 151   | -512  | 201        | -693         | 251   | -1127 | 301   | -1238 |
| 2     | -7    | 52    | -242  | 102   | -386  | 152   | -523  | 202        | -697         | 252   | -1129 | 302   | -1240 |
| 3     | -8    | 53    | -243  | 103   | -388  | 153   | -533  | 203        | -698         | 253   | -1135 | 303   | -1242 |
| 4     | -12   | 54    | -247  | 104   | -389  | 154   | -541  | 204        | -709         | 254   | -1138 | 304   | -1243 |
| 5     | -51   | 55    | -248  | 105   | -390  | 155   | -542  | 205        | -710         | 255   | -1140 | 305   | -1245 |
| 6     | -54   | 56    | -249  | 106   | -392  | 156   | -544  | 206        | -717         | 256   | -1143 | 306   | -1249 |
| 7     | -57   | 57    | -251  | 107   | -394  | 157   | -547  | 207        | -718         | 257   | -1144 | 307   | -1255 |
| 8     | -67   | 58    | -252  | 108   | -396  | 158   | -549  | 208        | -729         | 258   | -1148 | 308   | -1256 |
| 9     | -68   | 59    | -255  | 109   | -399  | 159   | -550  | 209        | -732         | 259   | -1150 | 309   | -1258 |
| 10    | -72   | 60    | -256  | 110   | -401  | 160   | -553  | 210        | -741         | 260   | -1157 | 310   | -1262 |
| 11    | -73   | 61    | -259  | 111   | -404  | 161   | -556  | 211        | -857         | 261   | -1159 | 311   | -1264 |
| 12    | -78   | 62    | -260  | 112   | -405  | 162   | -559  | 212        | -858         | 262   | -1160 | 312   | -1267 |
| 13    | -79   | 63    | -263  | 113   | -406  | 163   | -561  | 213        | -860         | 263   | -1164 | 313   | -1270 |
| 14    | -83   | 64    | -264  | 114   | -410  | 164   | -562  | 214        | -867         | 264   | -1167 | 314   | -1271 |
| 15    | -84   | 65    | -268  | 115   | -411  | 165   | -565  | 215        | -876         | 265   | -1170 | 315   | -1273 |
| 16    | -87   | 66    | -270  | 116   | -412  | 166   | -573  | 216        | -881         | 266   | -1174 | 316   | -1275 |
| 17    | -89   | 67    | -273  | 117   | -415  | 167   | -577  | 217        | -886         | 267   | -1177 | 317   | -1279 |
| 18    | -91   | 68    | -274  | 118   | -418  | 168   | -857  | 218        | -897         | 268   | -1181 | 318   | -1284 |
| 19    | -92   | 69    | -276  | 119   | -420  | 169   | -582  | 219        | -904         | 269   | 1183  | 319   | -1286 |
| 20    | -95   | 70    | -277  | 120   | -421  | 170   | -591  | 220        | -906         | 270   | -1184 | 320   | -1289 |
| 21    | -97   | 71    | -278  | 121   | -424  | 171   | -595  | 221        | -912         | 271   | -1185 | 321   | -1292 |
| 22    | -98   | 72    | -280  | 122   | -425  | 172   | -597  | 222        | -913         | 272   | -1186 | 322   | -1293 |
| 23    | -102  | 73    | -281  | 123   | -426  | 173   | -599  | 223        | -932         | 273   | -1187 | 323   | -1294 |
| 24    | -103  | 74    | -284  | 124   | -428  | 174   | -601  | 224        | -941         | 274   | -1190 | 324   | -1295 |
| 25    | -127  | 75    | -286  | 125   | -440  | 175   | -606  | 225        | -945         | 275   | -1191 | 325   | -1296 |
| 26    | -131  | 76    | -288  | 126   | -441  | 176   | -613  | 226        | -959         | 276   | 1193  | 326   | -1298 |
| 27    | -133  | 77    | -290  | 127   | -443  | 177   | -619  | 227        | -962         | 277   | -1198 | 327   | -1301 |
| 28    | -136  | 78    | -291  | 128   | -446  | 178   | -620  | 228        | -964         | 278   | -1201 | 328   | -1302 |
| 29    | -150  | 79    | -293  | 129   | -447  | 179   | -623  | 229        | -967         | 279   | -1204 | 329   | -1305 |
| 30    | -151  | 80    | -295  | 130   | -449  | 180   | -627  | 230        | -968         | 280   | -1205 | 330   | -1306 |
| 31    | -152  | 81    | -297  | 131   | -451  | 181   | -634  | 231        | -969         | 281   | -1208 | 331   | -1307 |
| 32    | -162  | 82    | -300  | 132   | -452  | 182   | -641  | 232        | -971         | 282   | -1211 | 332   | -1310 |
| 33    | -165  | 83    | -303  | 133   | -453  | 183   | -642  | 233        | -983         | 283   | -1215 | 333   | -1311 |
| 34    | -166  | 84    | 304   | 134   | -454  | 184   | -648  | 234        | -988         | 284   | -1218 | 334   | -1314 |
| 35    | -180  | 85    | -308  | 135   | -455  | 185   | -652  | 235        | -989         | 285   | -1219 | 335   | -1315 |
| 36    | -183  | 86    | -318  | 136   | -457  | 186   | -653  | 236        | -990         | 286   | -1220 | 336   | -1327 |
| 37    | -185  | 87    | -321  | 137   | -461  | 187   | -657  | 237        | -1002        | 287   | -1221 | 337   | -1329 |
| 38    | -187  | 88    | -324  | 138   | -464  | 188   | -658  | 238        | -1003        | 288   | -1222 | 338   | -1332 |
| 39    | -190  | 89    | -327  | 139   | -467  | 189   | -659  | 239        | -1009        | 289   | -1223 | 339   | -1334 |
| 40    | -192  | 90    | -331  | 140   | -470  | 190   | -663  | 240        | -1012        | 290   | -1224 | 340   | -1342 |
| 41    | -195  | 91    | -335  | 141   | -473  | 191   | -664  | <b>241</b> | <b>-1020</b> | 291   | -1225 | 341   | -1343 |
| 42    | -196  | 92    | -341  | 142   | -476  | 192   | -669  | 242        | -1050        | 292   | -1226 | 342   | -1347 |
| 43    | -200  | 93    | -342  | 143   | -478  | 193   | -674  | 243        | -1270        | 293   | -1227 | 343   | -1348 |
| 44    | -202  | 94    | -351  | 144   | -479  | 194   | -677  | <b>244</b> | <b>-1074</b> | 294   | -1228 | 344   | -1352 |
| 45    | -204  | 95    | -354  | 145   | -485  | 195   | -678  | 245        | -1093        | 295   | -1229 | 345   | -1357 |
| 46    | -205  | 96    | -357  | 146   | -488  | 196   | -679  | 246        | -1096        | 296   | -1230 | 346   | -1358 |
| 47    | -211  | 97    | -361  | 147   | -494  | 197   | -680  | 247        | -1102        | 297   | -1231 | 347   | -1361 |
| 48    | -216  | 98    | -362  | 148   | -501  | 198   | -681  | 248        | -1117        | 298   | -1232 | 348   | -1362 |
| 49    | 217   | 99    | 363   | 149   | -505  | 199   | -691  | 249        | -1121        | 299   | -1233 | 349   | -1364 |
| 50    | -222  | 100   | -367  | 150   | -506  | 200   | -692  | 250        | -1125        | 300   | -1235 | 350   | -1365 |

Cyt\_P, the cytosine position immediately upstream of the translation start site of *OslG1* gene.

Seq\_P: The sequence position immediately upstream of the translation start site of *OslG1* gene.
